# Supplementary material for: Natural weathering of soft- and hardwoods modified by contact and flame charring methods
Source: Springer Nature journal article supplement (doi:10.1007/s00107-022-01864-w), 2022-08-02
Supplement: MOESM1 [file 23330004]

## Supplementary materials

Table S1. Results of visual evaluation: Defect quantities (mold, flaking, cracks) evaluated on scale of 0-5, where 0 = no visible defects and 5 = dense pattern of defects, median value of three replicates. Flaked area has been estimated as percentage of whole surface. Number of cracks is the number of largest cracks, averaged between 3 replicates with standard deviation in parenthesis. Depth of deepest cracks is evaluated on a scale 1-3, where 1 = checking, 2 = penetrates top-coat, 3 = penetrates whole system.

| Sample, Birch | Mold | Flaking | Flaked area, % | Cracks, quantity (0-5) | Cracks, No. of | Cracks, depth (1-3) |
|---------------|------|---------|----------------|------------------------|----------------|---------------------|
| Ref           | 4    | 4       | 60.0           | 0                      | 0.0            | 1                   |
| Ref-O         | 5    | 4       | 45.0           | 5                      | 9.7 (2.3)      | 3                   |
| Paint         | 0    | 0       | 6.7 (2.9)      | 0                      | 0.0            | 1                   |
| 320           | 0    | 0       | 0.0            | 5                      | 15.0 (2.6)     | 3                   |
| 320-O         | 0    | 0       | 0.3 (0.6)      | 5                      | 16.7 (4.0)     | 3                   |
| F             | 0    | 2.5     | 21.3 (24.8)    | 1.5                    | 10.0           | 2                   |
| F-O           | 0    | 1       | 3.0 (1.7)      | 3                      | 7.3 (4.6)      | 3                   |
| FB            | 0    | 0       | 8.0 (1.7)      | 5                      | 10.3 (2.5)     | 3                   |
| FB-O          | 0    | 0       | 8.0 (1.7)      | 3                      | 7.3 (2.5)      | 3                   |

| Sample, Spruce | Mold (0-5) | Flaking (0-5) | Flaked area, % | Cracks, quantity (0-5) | Cracks, No. of | Cracks, depth (1-3) |
|----------------|------------|---------------|----------------|------------------------|----------------|---------------------|
| Ref            | 2          | 3             | 18.3 (10.4)    | 5                      | 5.3 (2.9)      | 3                   |
| Ref-O          | 2          | 1             | 5.0            | 5                      | 4.0            | 3                   |
| Paint          | 0          | 2             | 6.7 (7.6)      | 3                      | 2.0 (1.0)      | 1                   |
| 320            | 1          | 0             | 1.7 (2.9)      | 5                      | 7.3 (1.2)      | 3                   |
| 320-O          | 1          | 0             | 0.0            | 5                      | 6.7 (2.1)      | 3                   |
| F              | 0          | 2             | 20.0           | 4                      | 1.3 (0.6)      | 1                   |
| F-O            | 0          | 2             | 2.5 (3.5)      | 0.5                    | 0.5 (0.7)      | 0.5                 |
| FB             | 1          | 0             | 28.3 (2.9)     | 3                      | 2.3 (1.5)      | 1                   |
| FB-O           | 1          | 0.5           | 10.0           | 3                      | 4.0            | 2                   |

| Sample, Pine | Mold | Flaking | Flaked area, % | Cracks, quantity (0-5) | Cracks, No. of | Cracks, depth (1-3) |
|--------------|------|---------|----------------|------------------------|----------------|---------------------|
| Ref          | 4    | 3       | 2.3 (2.5)      | 5                      | 8.0            | 3                   |
| Ref-O        | 4    | 3       | 8.3 (10.4)     | 5                      | 5.7 (1.2)      | 3                   |
| Paint        | 0    | 0       | 0.3 (0.6)      | 0                      | 0.0            | 3                   |
| 320          | 0    | 0       | 0.0            | 5                      | 6.0            | 0                   |
| 320-O        | 0    | 0       | 0.0            | 5                      | 3.3 (1.2)      | 3                   |
| F            | 0    | 3       | 40.0           | 5                      | 4.0 (1.0)      | 3                   |
| F-O          | 0    | 3       | 20.0 (5.0)     | 4                      | 2.3 (1.2)      | 3                   |
| FB           | 1    | 0       | 0.0            | 5                      | 4.7 (0.6)      | 3                   |
| FB-O         | 2    | 0       | 0.0            | 4                      | 2.7 (0.6)      | 3                   |

Table S2. Detailed color measurements.

|       | Before weathering |               |              |               | After weathering |                |               |              | $\Delta E$ |
|-------|-------------------|---------------|--------------|---------------|------------------|----------------|---------------|--------------|------------|
|       | Color             | L*            | a*           | b*            | Color            | L*             | a*            | b*           |            |
| Birch | Color             | L*            | a*           | b*            | Color            | L*             | a*            | b*           | $\Delta E$ |
| Ref   | Beige             | 74.5<br>(2.1) | 6.8<br>(0.9) | 27.9<br>(4.5) | Gray             | 50.0<br>(15.6) | 2.1<br>(0.4)  | 3.3<br>(3.9) | 35.0       |
| Ref-O | Beige/Yellow      | 74.2<br>(2.3) | 8.2<br>(1.8) | 46.2<br>(3.0) | Gray/Black       | 30.9<br>(4.1)  | 2.4<br>(0.4)  | 5.6<br>(1.4) | 59.7       |
| Paint | Black             | 3.6<br>(0.2)  | 0.0<br>(0.0) | 0.1<br>(0.1)  | Black            | 4.1<br>(0.5)   | 0.25<br>(0.1) | 0.0<br>(0.2) | 0.6        |
| 320   | Black/Brown       | 5.4<br>(1.6)  | 2.7<br>(1.7) | 3.5<br>(2.1)  | Black            | 21.8<br>(6.3)  | 4.3<br>(0.3)  | 6.9<br>(0.8) | 16.8       |
| 320-O | Black             | 5.2<br>(0.8)  | 0.9<br>(0.7) | 1.5<br>(0.8)  | Black            | 17.5<br>(3.1)  | 2.6<br>(0.5)  | 4.7<br>(0.7) | 12.8       |
| F     | Black             | 5.5<br>(1.4)  | 0.2<br>(0.2) | 1.3<br>(0.6)  | Black            | 4.9<br>(0.8)   | 0.2<br>(0.1)  | 0.8<br>(0.2) | 0.8        |
| F-O   | Black             | 5.2<br>(1.2)  | 0.2<br>(0.1) | 1.5<br>(0.5)  | Black            | 6.7<br>(1.4)   | 0.0<br>(0.1)  | 1.3<br>(0.5) | 1.6        |
| FB    | Black             | 4.7<br>(0.8)  | 1.5<br>(0.6) | 2.4<br>(0.7)  | Black            | 10.7<br>(4.4)  | 2.3<br>(0.9)  | 4.5<br>(0.2) | 6.4        |
| FB-O  | Black             | 5.1<br>(0.9)  | 0.4<br>(0.2) | 1.4<br>(0.3)  | Black            | 12.3<br>(3.4)  | 1.9<br>(0.5)  | 4.2<br>(1.1) | 7.9        |

|        | Before weathering |               |              |               | After weathering |                |              |              | $\Delta E$ |
|--------|-------------------|---------------|--------------|---------------|------------------|----------------|--------------|--------------|------------|
|        | Color             | L*            | a*           | b*            | Color            | L*             | a*           | b*           |            |
| Spruce | Color             | L*            | a*           | b*            | Color            | L*             | a*           | b*           | $\Delta E$ |
| Ref    | Beige             | 80.3<br>(2.1) | 3.3<br>(0.6) | 24.1<br>(1.3) | Gray/Beige       | 58.6<br>(11.9) | 2.8<br>(0.8) | 4.8<br>(2.1) | 29.0       |
| Ref-O  | Beige             | 81.2<br>(3.0) | 3.4<br>(1.0) | 31.6<br>(1.8) | Gray             | 45.8<br>(6.6)  | 2.3<br>(0.3) | 3.9<br>(1.0) | 45.0       |
| Paint  | Black             | 3.6<br>(0.7)  | 0.1<br>(0.1) | 0.0<br>(0.2)  | Black            | 4.8<br>(1.0)   | 0.3<br>(0.1) | 0.0<br>(0.2) | 0.9        |
| 320    | Black/Brown       | 7.3<br>(2.8)  | 5.3<br>(3.6) | 6.8<br>(8.6)  | Brown/Gray       | 27.4<br>(6.3)  | 5.4<br>(0.9) | 8.3<br>(1.5) | 20.2       |
| 320-O  | Black/Brown       | 5.1<br>(1.6)  | 3.3<br>(2.4) | 3.4<br>(2.3)  | Brown            | 31.0<br>(6.8)  | 5.0<br>(0.6) | 8.1<br>(1.1) | 26.4       |
| F      | Black             | 3.7<br>(2.5)  | 0.3<br>(1.1) | 0.7<br>(0.8)  | Black            | 5.6<br>(1.0)   | 0.9<br>(0.3) | 1.4<br>(0.4) | 2.1        |
| F-O    | Black             | 4.1<br>(0.9)  | 0.3<br>(0.1) | 1.2<br>(0.6)  | Black            | 5.2<br>(1.0)   | 0.6<br>(0.3) | 1.1<br>(0.4) | 1.1        |
| FB     | Brown/Black       | 10.5<br>(2.5) | 6.3<br>(1.1) | 10.1<br>(2.8) | Brown/Gray       | 35.9<br>(7.5)  | 4.4<br>(0.9) | 7.2<br>(1.5) | 25.6       |
| FB-O   | Brown/Black       | 8.8<br>(1.5)  | 5.7<br>(1.2) | 7.9<br>(2.3)  | Brown/Gray       | 31.6<br>(6.2)  | 4.4<br>(1.0) | 7.0<br>(1.7) | 22.9       |

| Pine  | Before weathering |               |               |               | After weathering |                |              |              | $\Delta E$ |
|-------|-------------------|---------------|---------------|---------------|------------------|----------------|--------------|--------------|------------|
|       | Color             | L*            | a*            | b*            | Color            | L*             | a*           | b*           |            |
| Ref   | Beige             | 79.3<br>(1.4) | 4.1<br>(0.9)  | 28.1<br>(1.9) | Gray             | 42.2<br>(8.8)  | 2.4<br>(0.7) | 4.2<br>(1.6) | 44.2       |
| Ref-O | Beige             | 80.7<br>(2.2) | 5.3<br>(1.4)  | 37.2<br>(4.2) | Gray             | 36.5<br>(6.2)  | 2.2<br>(0.3) | 4.2<br>(1.1) | 55.2       |
| Paint | Black             | 3.9<br>(0.6)  | -0.1<br>(0.1) | 0.1<br>(0.2)  | Black            | 4.6<br>(1.2)   | 0.3<br>(0.1) | 0.0<br>(0.1) | 0.8        |
| 320   | Black/Brown       | 6.7<br>(2.7)  | 4.9<br>(2.1)  | 6.1<br>(3.4)  | Brown/Black      | 19.5<br>(3.6)  | 5.5<br>(1.5) | 8.0<br>(1.5) | 13.0       |
| 320-O | Black/Brown       | 7.9<br>(2.4)  | 4.6<br>(2.1)  | 5.8<br>(2.7)  | Brown/Gray       | 27.6<br>(6.3)  | 5.0<br>(0.8) | 8.1<br>(1.5) | 19.9       |
| F     | Black             | 3.9<br>(0.8)  | 0.2<br>(0.2)  | 0.7<br>(0.3)  | Black            | 4.3<br>(0.9)   | 0.6<br>(0.3) | 0.8<br>(0.5) | 0.6        |
| F-O   | Black             | 3.7<br>(0.4)  | 0.1<br>(0.1)  | 1.0<br>(0.2)  | Black            | 5.7<br>(1.2)   | 0.5<br>(1.1) | 1.1<br>(1.1) | 2.0        |
| FB    | Black/Brown       | 7.8<br>(1.3)  | 3.5<br>(0.9)  | 6.0<br>(1.6)  | Black/Gray       | 22.3<br>(9.1)  | 2.7<br>(0.8) | 4.3<br>(1.3) | 14.6       |
| FB-O  | Black             | 4.3<br>(0.8)  | 1.4<br>(1.1)  | 2.0<br>(1.1)  | Black/Gray       | 26.0<br>(10.5) | 3.2<br>(0.6) | 4.6<br>(1.2) | 22.0       |

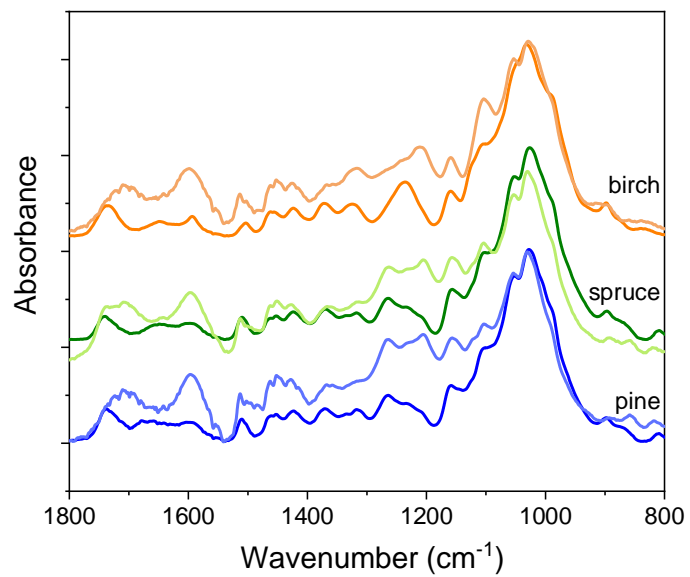

Figure S3. FTIR spectra of unmodified and contact charred samples. Darker color indicates unmodified and lighter color contact charred samples.

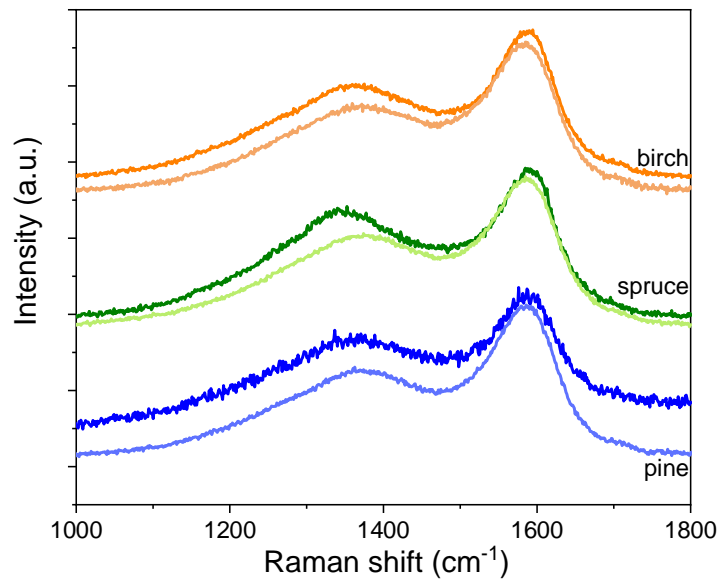

Figure S4. Raman D and G bands of contact and flame charred samples. Darker color indicates flame charring and lighter contact charring.
